# Supplementary material for: Adsorption removal of Mn2+ and NH4+–N from electrolytic manganese metal wastewater by modified phosphate ore flotation tailings
Source: Royal Society of Chemistry journal article supplement (doi:10.1039/d2ew00507g), 2022-11-15
Supplement: d2ew00507g1.pdf [file d2ew00507g1.pdf]

1

## Supporting Information for

2

**Adsorption removal  $Mn^{2+}$  and  $NH_4^+-N$  from electrolytic manganese metal**

3

**wastewater by modified phosphate ore flotation tailings**

4

Yuhao Wu<sup>a</sup>, Jiancheng Shu<sup>a\*</sup>, Wenxing Cao<sup>a</sup>, Zihan Li<sup>a</sup>, Bing Li<sup>b</sup>, Zhonghui Xu<sup>a</sup>, Hongliang

5

Chen<sup>a,c</sup>, Mengjun Chen<sup>a</sup>, Zongyu Deng<sup>d</sup>

6

a. *Key Laboratory of Solid Waste Treatment and Resource Recycle (SWUST), Ministry of Education,*

7

*Southwest University of Science and Technology, 59 Qinglong Road, Mianyang, 621010, China*

8

b. *School of Chemistry and Chemical Engineering, Yangtze Normal University, Chongqing, 408100,*

9

*China*

10

c. *College of Chemistry and Chemical Engineering, Anshun University, Anshun, Guizhou, 561000,*

11

*PR China*

12

d. *Zunyi manganese day magnetic industry group co.,Ltd, Zunyi, Guizhou, 563000, China*

13

1

## Figure list

| Serial number | Figure captions                                                                                                                                                                     | Pages |
|---------------|-------------------------------------------------------------------------------------------------------------------------------------------------------------------------------------|-------|
| S1            | Equilibrium Adsorption isotherms (a: Langmuir model; b: Freundlich model).                                                                                                          | 3-4   |
| S2            | Adsorption kinetics (a: The effect of time on adsorption; b: quasi-first-order adsorption model; c: quasi-second-order adsorption model; d: Weber's intraparticle diffusion model). | 5-6   |
| S3            | Adsorption thermodynamics.                                                                                                                                                          | 7     |

2

3

## Table list

| Serial number | Table captions                                                                                 | Pages |
|---------------|------------------------------------------------------------------------------------------------|-------|
| S1            | Adsorption free energy change                                                                  | 8     |
| S2            | XRF analysis of the POFTs and MPOFTs                                                           | 9     |
| S3            | Surface areas of the POFTs and MPOFTs                                                          | 10    |
| S4            | ICP analysis of leachates (mg/L) (1#: POFTs, 2#:MPOFTs, 3#: EMMW,4#: MPOFTs after adsorption). | 11    |

4

## 1 Calculation formula

2 The calculation formula for the adsorption capacity at equilibrium ( $q_e$ , mg/g) and the adsorption  
3 capacity at different time “ $t$ ” ( $q_t$ , mg/g) are as follows:

$$q_e = \frac{(C_0 - C_e) \times V}{m}$$

(1)

$$q_t = \frac{(C_0 - C_t) \times V}{m}$$

(2)

7 Where  $C_0$ ,  $C_e$  and  $C_t$  are the initial, equilibrium concentration (mg/L) of  $\text{NH}_4^+\text{-N}$  and the  
8 concentration of  $\text{NH}_4^+\text{-N}$  at different time “ $t$ ”, respectively.  $V$  is the volume of the EMMW (L), and  
9  $m$  is the mass of the MPOFTs (g).

## 10 Analysis methods

11 The concentrations of  $\text{Mn}^{2+}$  and other heavy metals were determined by Atomic Absorption  
12 Spectrophotometry (AAS) (HITACHI 180/80, Japan) in flame. The concentration of  $\text{NH}_4^+\text{-N}$  was  
13 determined via Nessler’s Reagent spectrophotometry. The pH of the solution was measured by using  
14 ultra-microvolume pH electrodes (PHS-3C, Shanghai, China). The precipitates composition and  
15 properties were analyzed via X-ray diffraction instrument (XRD; JapanD/maxIII A), Scanning  
16 Electron Microscope (SEM; Sigma 300) and X-ray fluorescence (XRF; PANalytical B.V., Axios;  
17 Netherlands). The Magna 550II FTIR Spectrometer (Perkin Elmer Frontier) was used to obtain the  
18 FT-IR spectra of the sample via the KBr particle method. According to the extraction procedure of  
19 solid waste, the toxic leaching method of horizontal vibration was selected (HJ 557-2010)

## 20 S1 Equilibrium adsorption isotherms

21 The equilibrium adsorption isotherm is an important data model that can reflect the surface  
22 properties and adsorption behavior of adsorbents. It can be fitted by Langmuir model and Freundlich  
23 model and expressed as an equation in linear form.

$$\text{Langmuir model: } \frac{C_e}{q_e} = \frac{1}{K_L q_m} + \frac{C_e}{q_m}$$

(1)

26 Where  $K_L$  is the adsorption equilibrium constant (L/ mg),  $q_m$  is the maximum monolayer

- 1 adsorption capacity, and  $q_e$  is the amount adsorbed on a unit mass of the adsorbent (mg/g) when  
 2 the equilibrium concentration is  $C_e$  (mg/L).

3 Freundlich model: 
$$\ln q_e = \frac{\ln C_e}{n} + \ln K_F \quad (2)$$

- 4 where  $K_F$  ((mg/g) (L/g)<sup>n</sup>) and  $n$  are Freundlich constants related to sorption capacity and  
 5 sorption intensity of adsorbents.

6 **Fig.S1a**

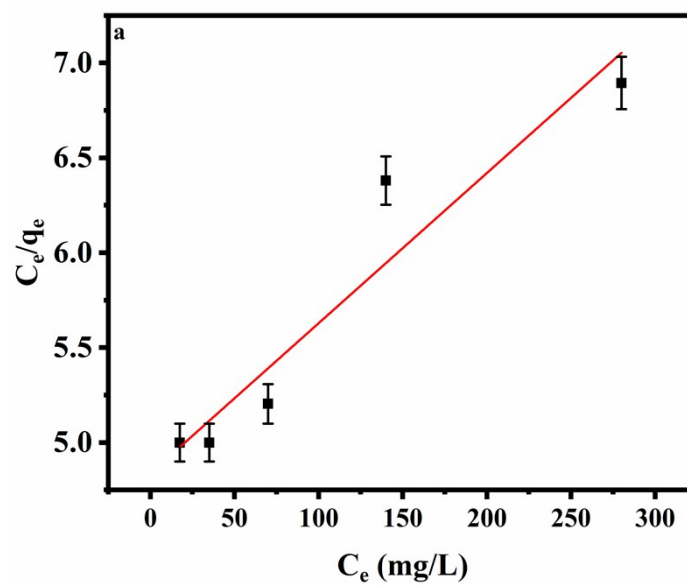

7

8 **Fig.S1b**

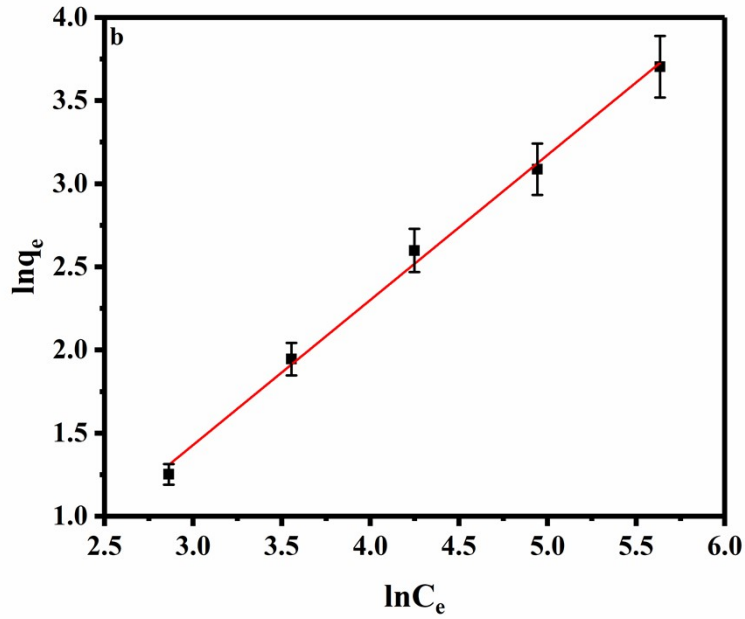

1

## 2 S2 Adsorption kinetics

3 Adsorption kinetics is composed of pseudo-first-order and pseudo-second-order kinetic  
 4 models. They were analyzed to test the experimental data. These two models can be expressed in a  
 5 linear form as Eqs. (3) and (4), respectively.

6 The pseudo-first-order kinetic model:  $\ln (q_e - q_t) = \ln q_e - K_1 t$  (3)

7 The pseudo-second-order kinetic model:  $\frac{t}{q_t} = \frac{1}{k_2 q_e^2} + \frac{t}{q_e}$  (4)

8 The steps of adsorption process were studied with Weber's intraparticle diffusion model. It can  
 9 be expressed as Eq.(5).

10 Weber's intraparticle diffusion model:  $q_t = K_i t^{\frac{1}{2}} + C$  (5)

11 where  $k_i$  (mg/g/min<sup>1/2</sup>) is the intraparticle diffusion rate constant and  $C$  (mg/g) represents the  
 12 intercept.

13 **Fig.S2a**

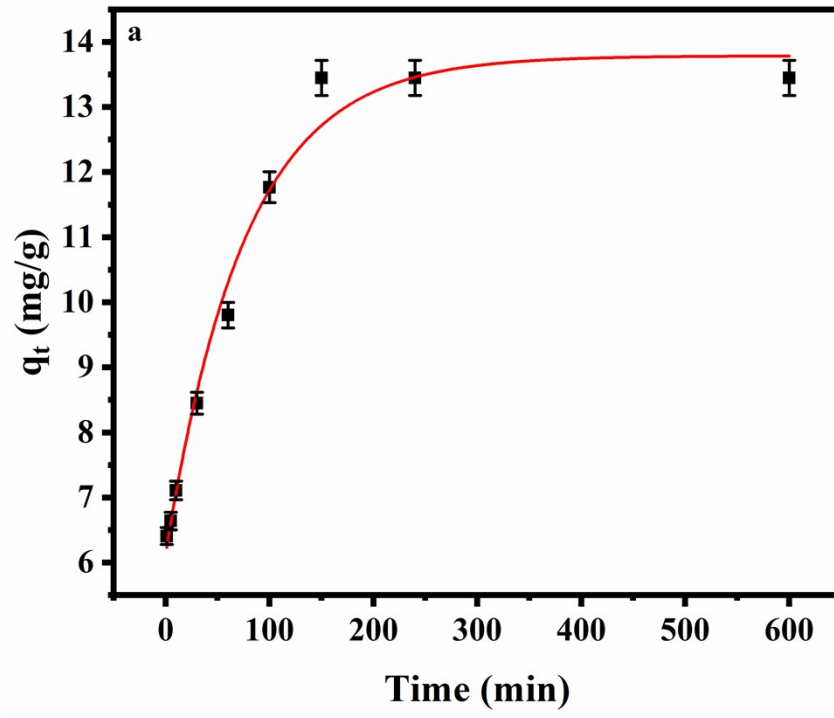

1

2

1 Fig.S2b

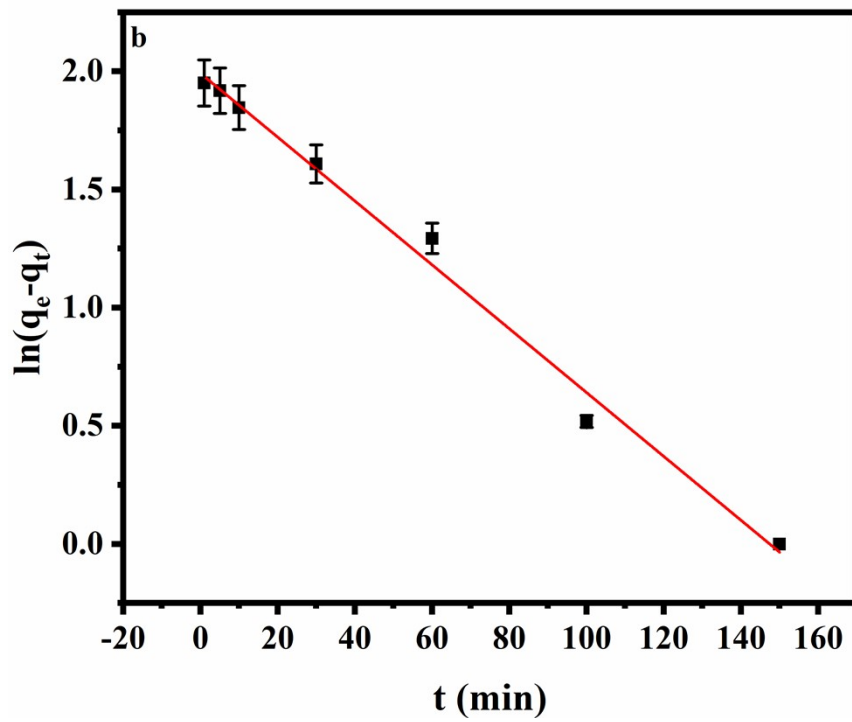

2

3

4 Fig.S2c

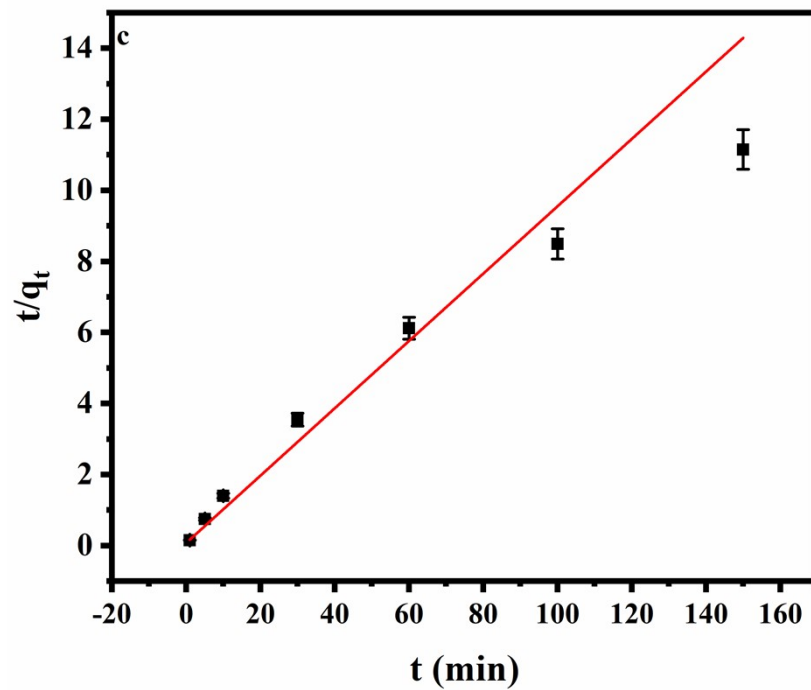

5

6

7

1 **Fig.S2d**

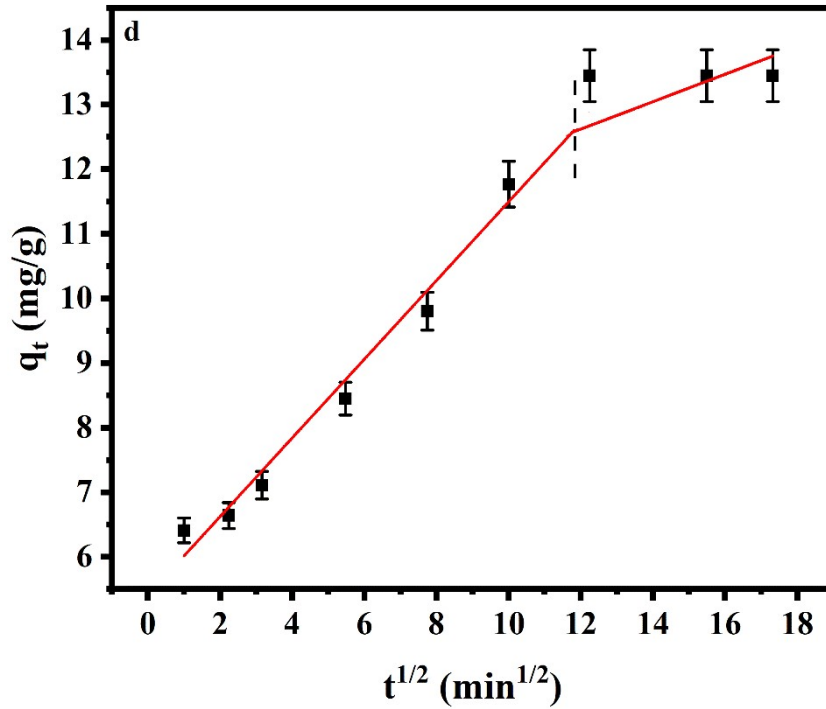

2

### 3 **S3 Adsorption thermodynamics**

4 Adsorption thermodynamics will explore the enthalpy change ( $\Delta H^0$ ) and Gibbs free energy  
5 change ( $\Delta G^0$ ) generated during the adsorption process. The enthalpy change data will be obtained  
6 by fitting the Clausius-clapeyron model. Gibbs free energy change will be derived from the Gibbs  
7 equation.

8 Clausius-clapeyron model: 
$$\ln C_e = \frac{\Delta H}{RT} + C \quad (6)$$

9 Gibbs equation: 
$$\Delta G = -RT \ln K_L \quad (7)$$

10 Where  $K_L$  is the Langmuir equilibrium constant (L/mol);  $R$  and  $T$  represent the universal gas  
11 constant (8.314 J/K/mol) and the system temperature (K), respectively.

12

13

14



1

2 **Fig.S3**

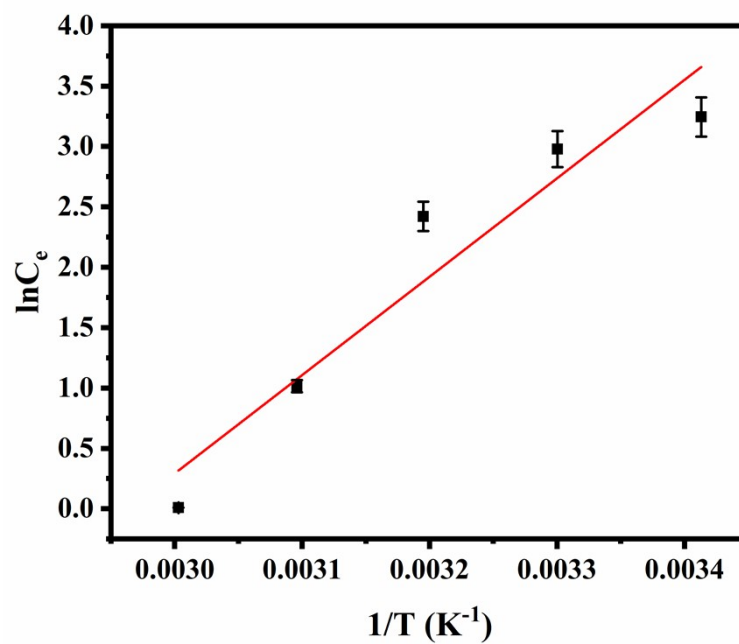

3

4

5

**Table S1** Adsorption free energy change

| Adsorption free energy change |                    |
|-------------------------------|--------------------|
| T (K)                         | $\Delta G$ (J/mol) |
| 293                           | -2793.36           |
| 303                           | -2888.70           |
| 313                           | -2984.04           |
| 323                           | -3079.37           |
| 333                           | -3174.71           |
| 343                           | -3270.05           |

6

7

8

9

10

11

12

1

2

**Table S2** XRF analysis of the POFTs and MPOFTs

|               | <b>Parameter</b>      | CaO   | MgO   | P <sub>2</sub> O <sub>5</sub> | SO <sub>3</sub> | SiO <sub>2</sub> | F    | Fe <sub>2</sub> O <sub>3</sub> | Al <sub>2</sub> O <sub>3</sub> | MnO  | K <sub>2</sub> O | Na <sub>2</sub> O | SrO  | TiO <sub>2</sub> | ZnO  |
|---------------|-----------------------|-------|-------|-------------------------------|-----------------|------------------|------|--------------------------------|--------------------------------|------|------------------|-------------------|------|------------------|------|
| <b>POFTs</b>  | <b>Percentage (%)</b> | 57.26 | 16.89 | 9.78                          | 8.16            | 3.53             | 1.70 | 1.06                           | 0.81                           | 0.29 | 0.19             | 0.07              | 0.05 | 0.05             | 0.04 |
| <b>MPOFTs</b> | <b>Percentage (%)</b> | 64.13 | 22.14 | 6.52                          | 0.73            | 3.15             | 0.31 | 1.67                           | 0.89                           | 0.48 | 0.20             | /                 | 0.04 | /                | 0.05 |

3

4

1

**Table S3** Surface areas of the POFTs and MPOFTs

| <b>Samples</b>                                       | <b>POFTs</b> | <b>MPOFTs</b> |
|------------------------------------------------------|--------------|---------------|
| <b>BET surface area (m<sup>2</sup>/g)</b>            | 2.2956       | 6.5239        |
| <b>BJH desorption pore volume (cm<sup>3</sup>/g)</b> | 0.0049524    | 0.038057      |

2

1

2 **Table S4** ICP analysis of leachates (mg/L) (1#: POFTs, 2#:MPOFTs, 3#: EMMW,4#: MPOFTs

3

after adsorption).

|           | NH <sub>4</sub> <sup>+</sup> -N | Mg <sup>2+</sup> | Mn <sup>2+</sup> | Ca <sup>2+</sup> | Zn <sup>2+</sup> | Sb <sup>2+</sup> | Co <sup>2+</sup> |
|-----------|---------------------------------|------------------|------------------|------------------|------------------|------------------|------------------|
| <b>1#</b> | /                               | 22.38            | 0.03             | 3.03             | /                | /                | /                |
| <b>2#</b> | /                               | 108.32           | /                | 0.01             | /                | /                | /                |
| <b>3#</b> | 70.00                           | 45.00            | 165.00           | 9.00             | 0.06             | 0.03             | 0.01             |
| <b>4#</b> | 1.73                            | 78.47            | 0.001            | 5.85             | /                | /                | /                |

4
